# Supplementary material
Source: PubMed Central journal article supplement (PMC5365694)
Supplement: AAC.02168-16_zac004176005s1.pdf [file AAC.02168-16_zac004176005s1.pdf]

Supplementary Materials:

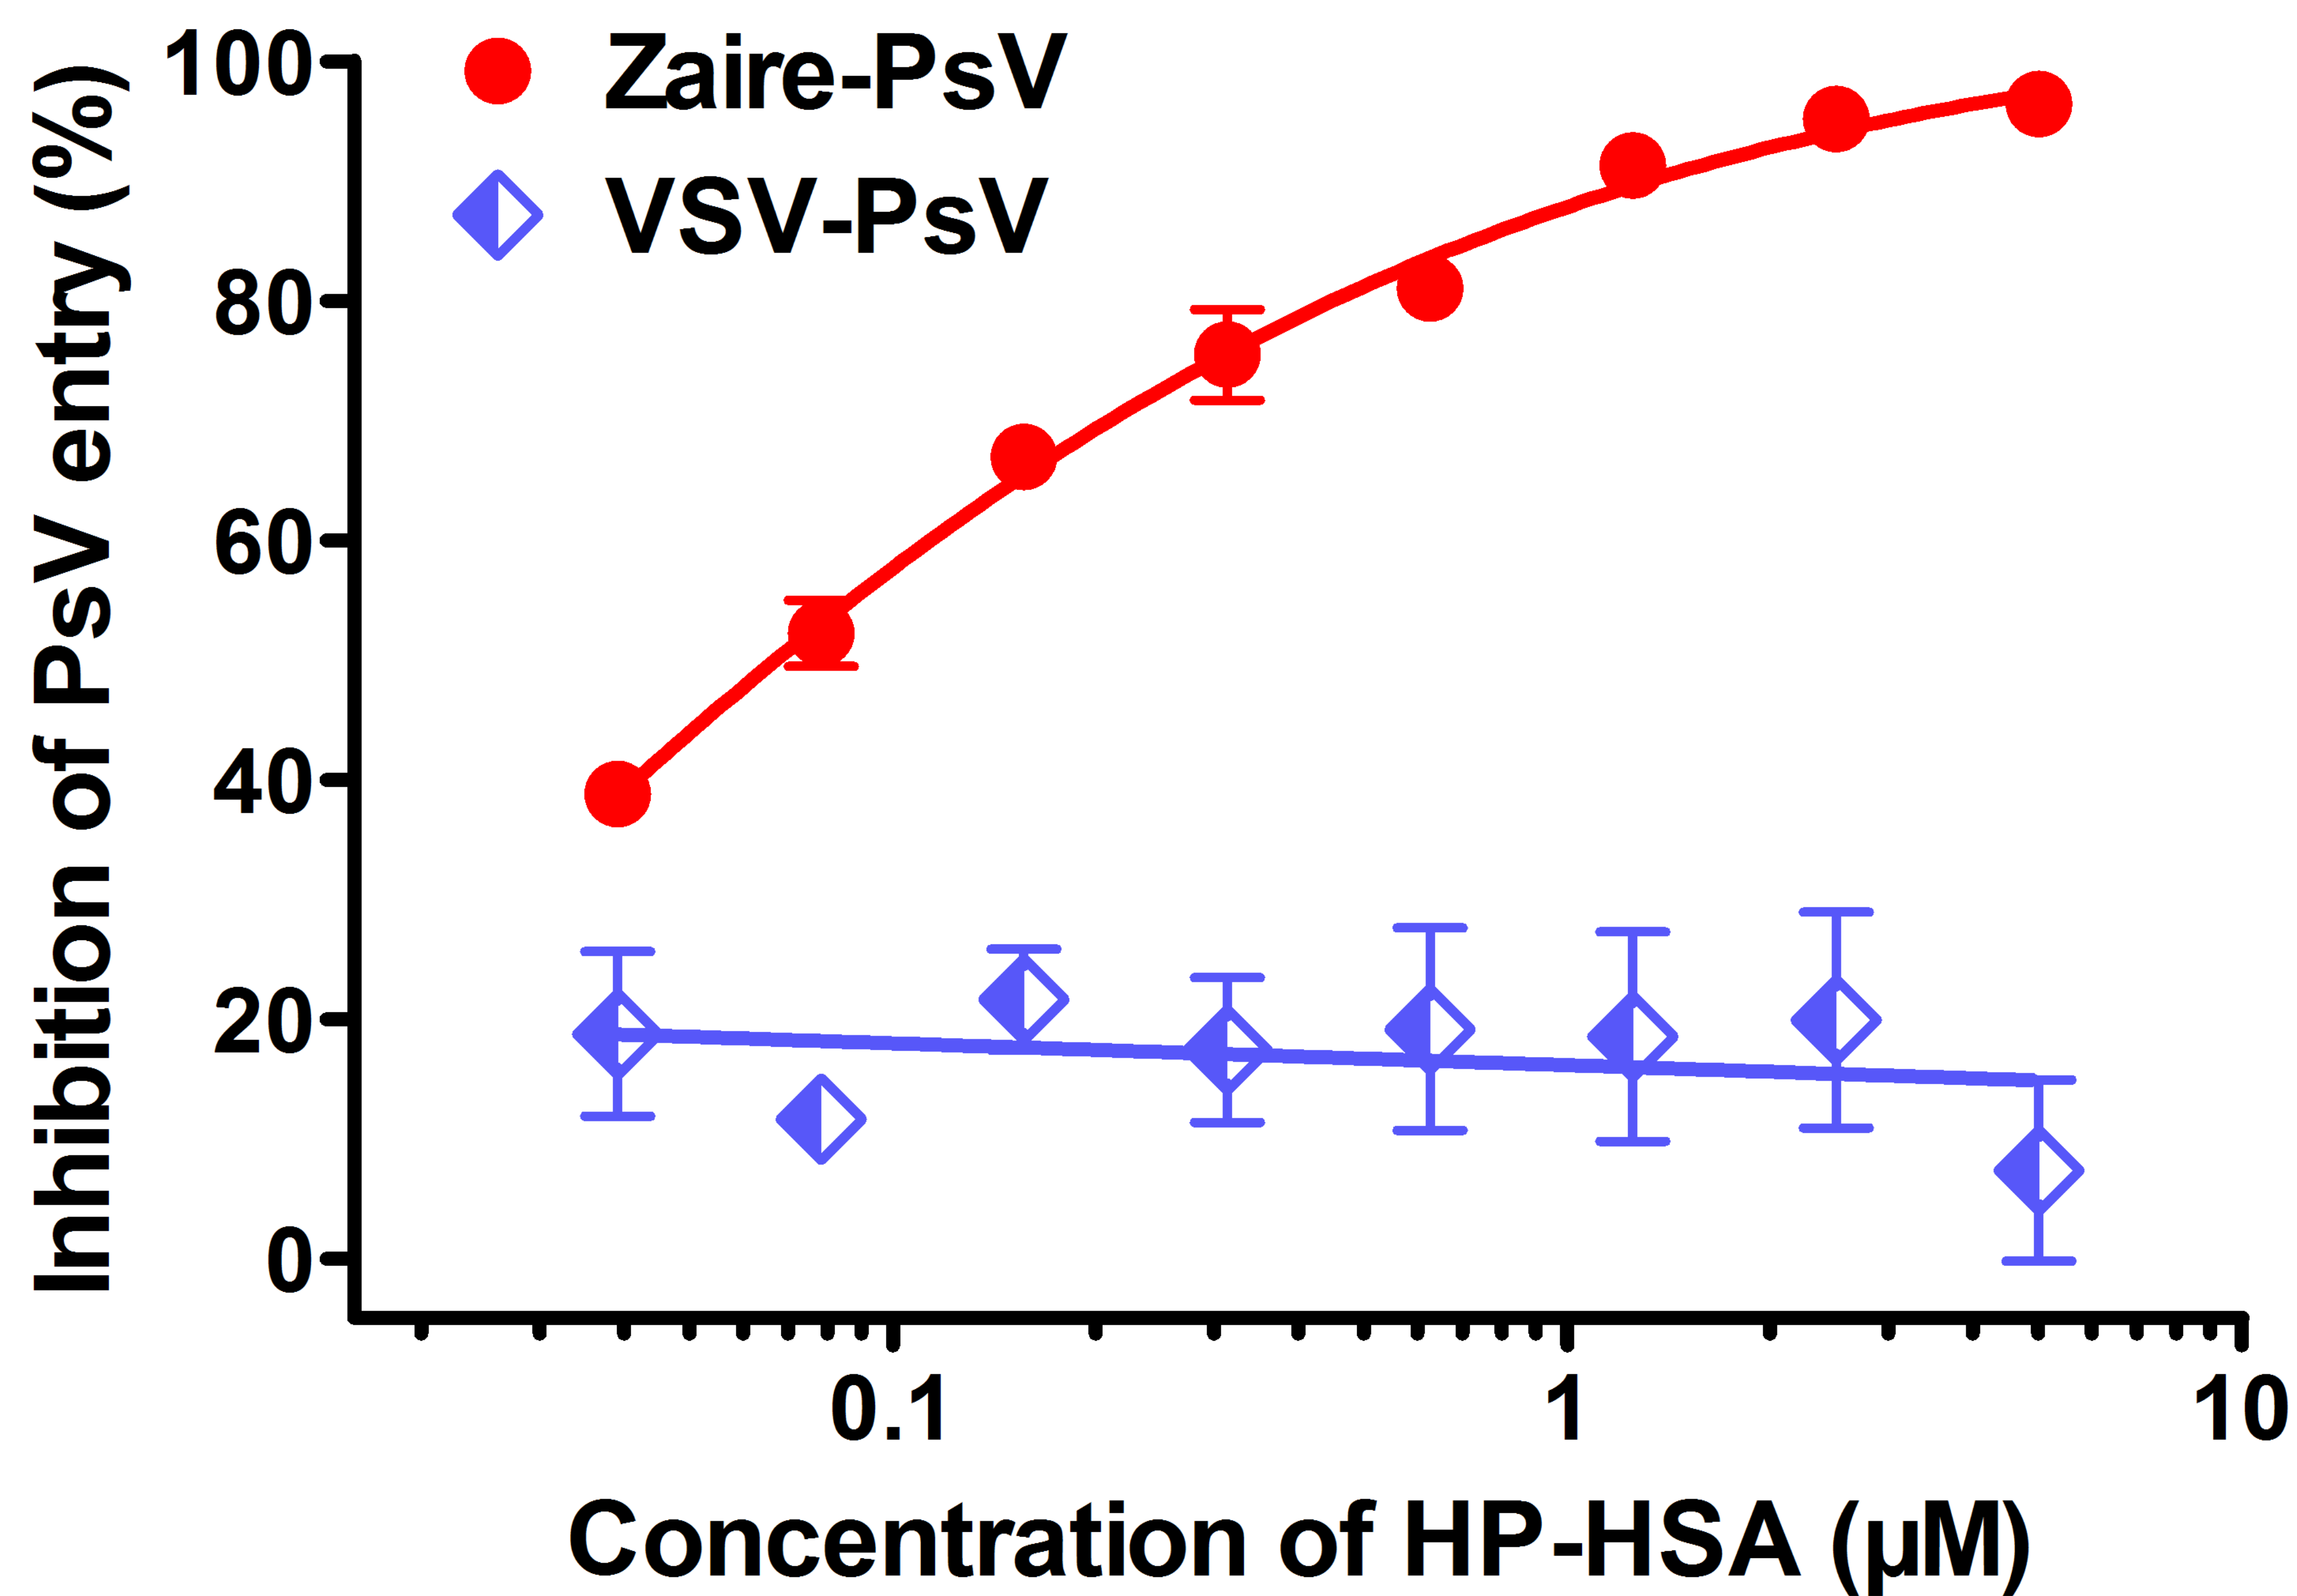

**FIG S1** Comparison of entry inhibitory activity of HP-HSA on Zaire pseudovirus and VSV pseudovirus. HuH-7 cells were served as target cell. The experiments were performed in triplicate, and the error bars indicate standard deviations.

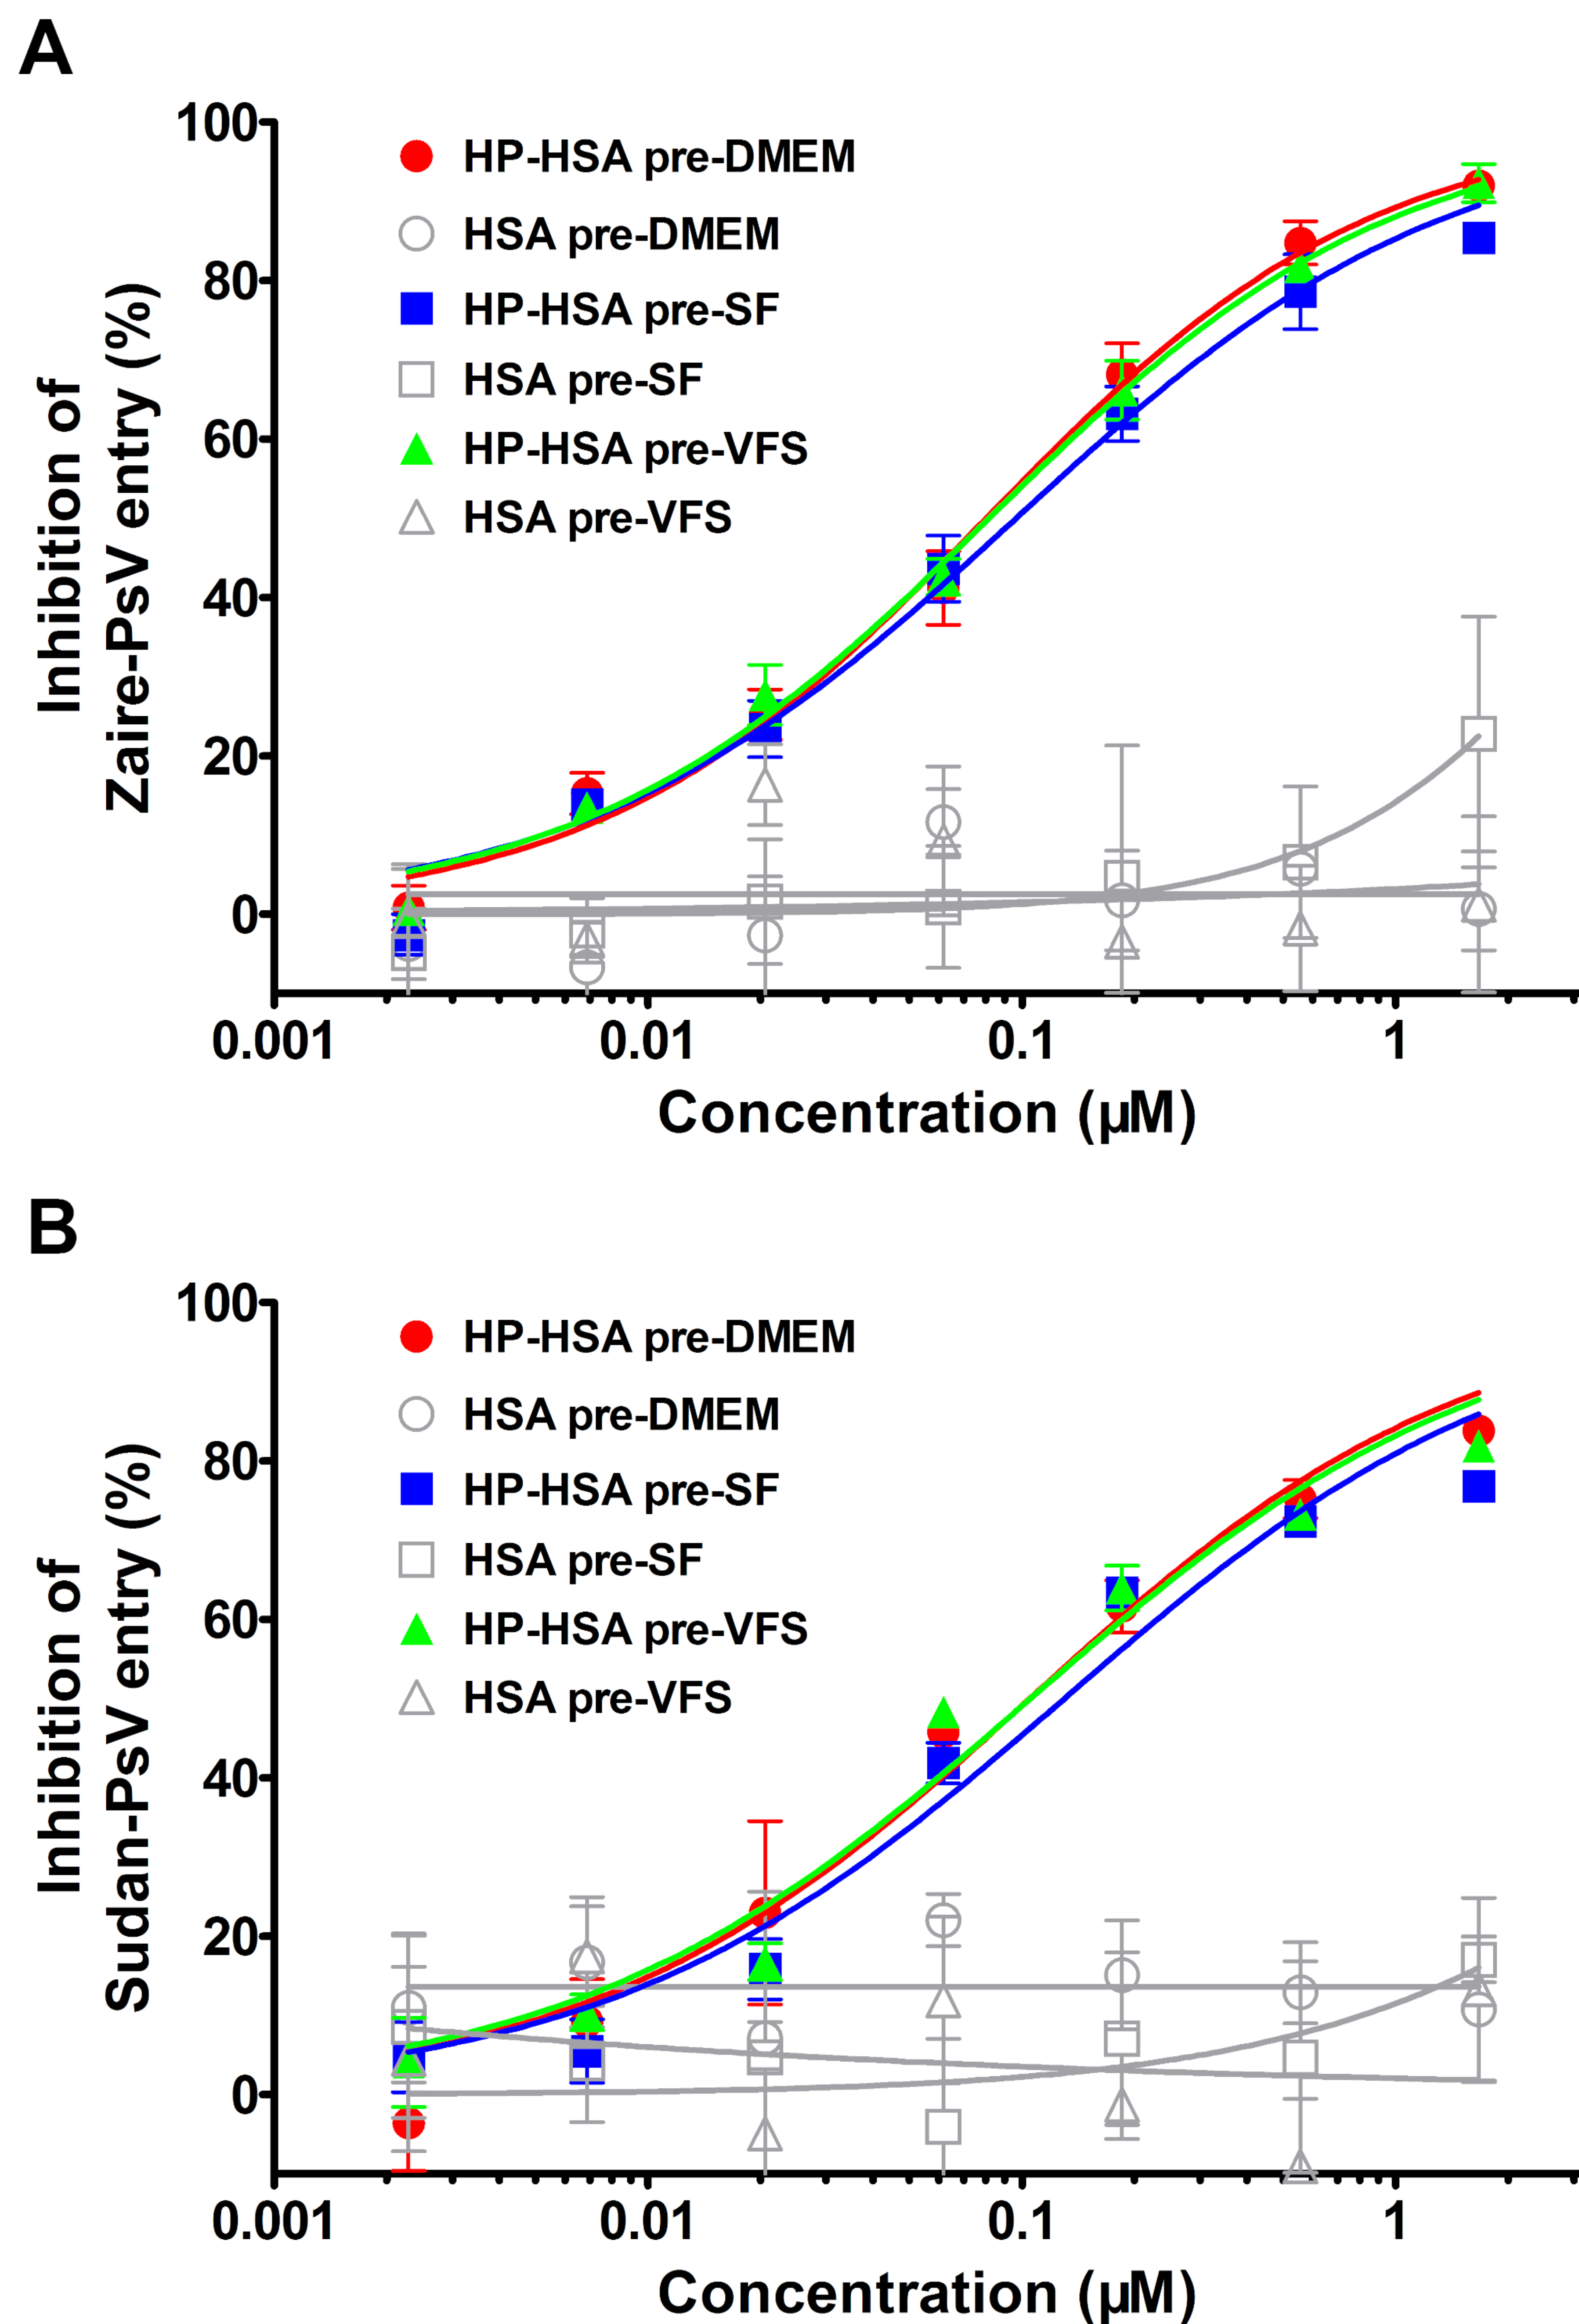

**FIG S2** The entry inhibitory activity of HP-HSA in human seminal fluid and VFS against EBOV-PsVs. HP-HSA and HSA were preincubated with DMEM, human seminal fluid (SF) or vaginal fluid simulant (VFS), respectively, before gradient dilution (“pre-” means “preincubated with”). The inhibitory activities of the premixed samples was evaluated with Zaire-PsV (A) and Sudan-PsV (B). All the experiments were performed in triplicate, and the error bars indicate standard deviations.

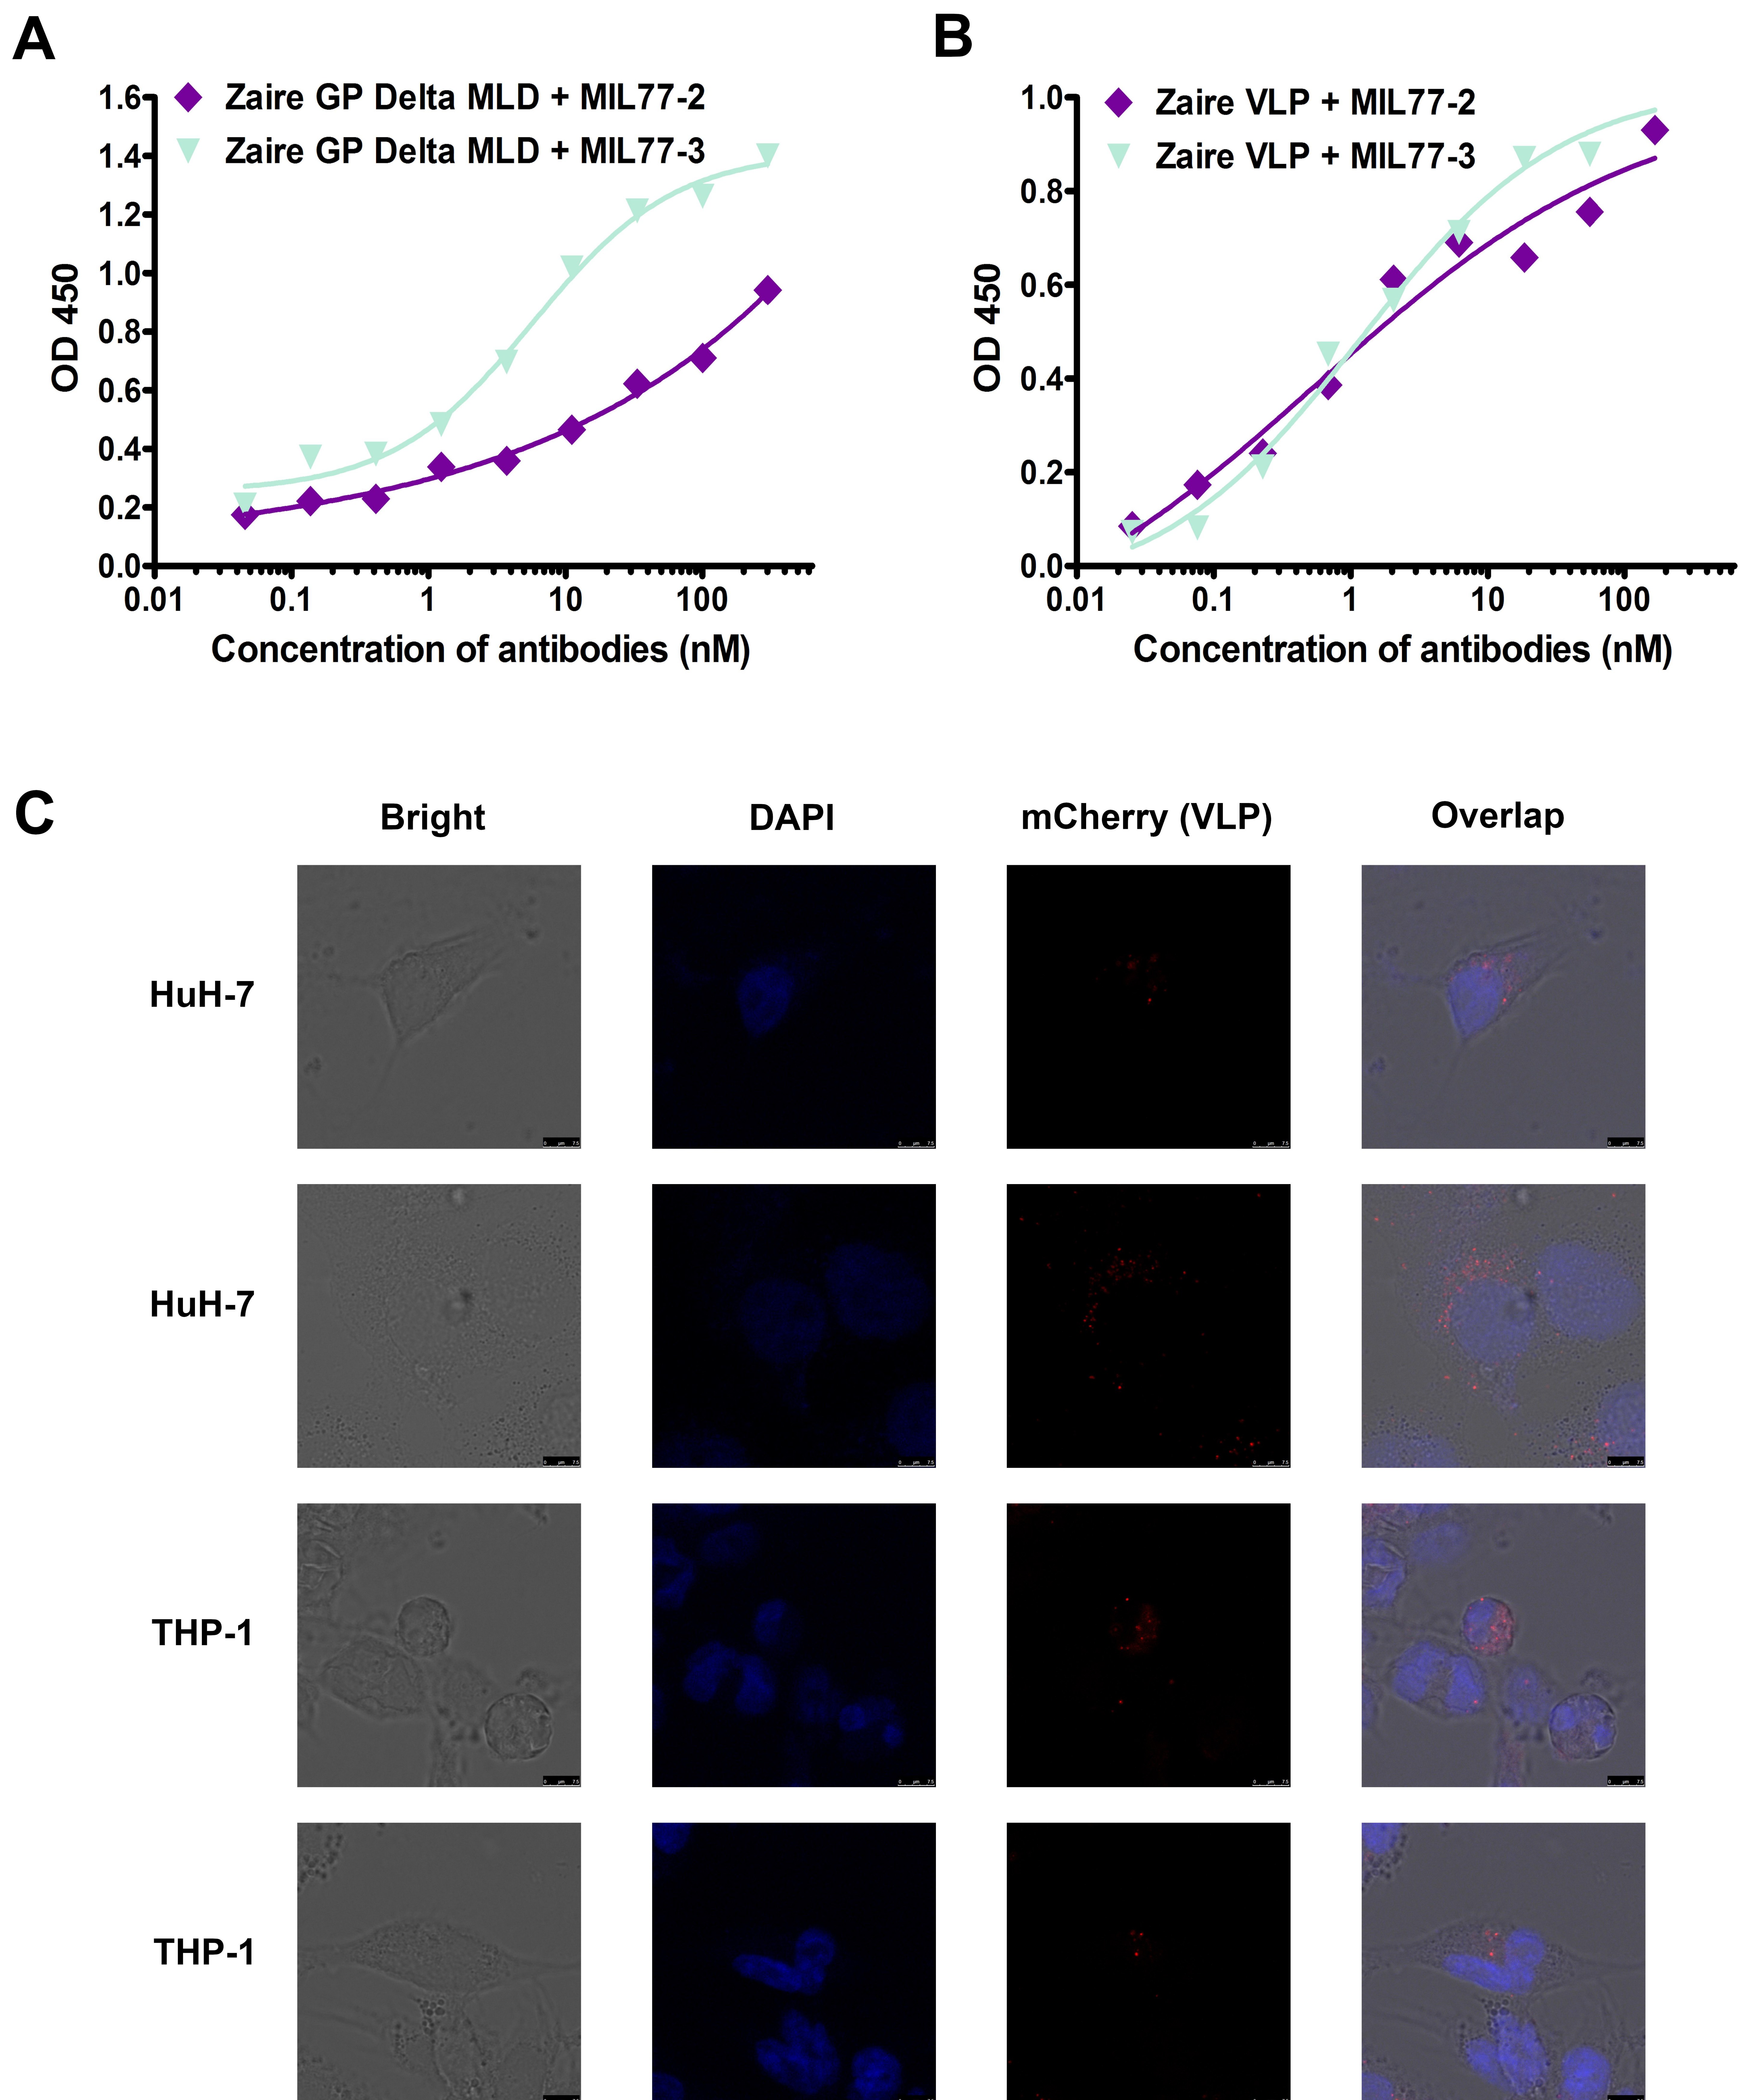

**FIG S3** The purified soluble Zaire GP (with a deletion of 314 - 462 aa and 637 - 676 aa) (A) and concentrated VLPs (B) were recognized by antibodies MIL77-2 and MIL77-3. The images of cells infected with mCherry-labeled Zaire-VLPs were captured by laser scanning confocal microscope and displayed as single channel images or merged images (C).

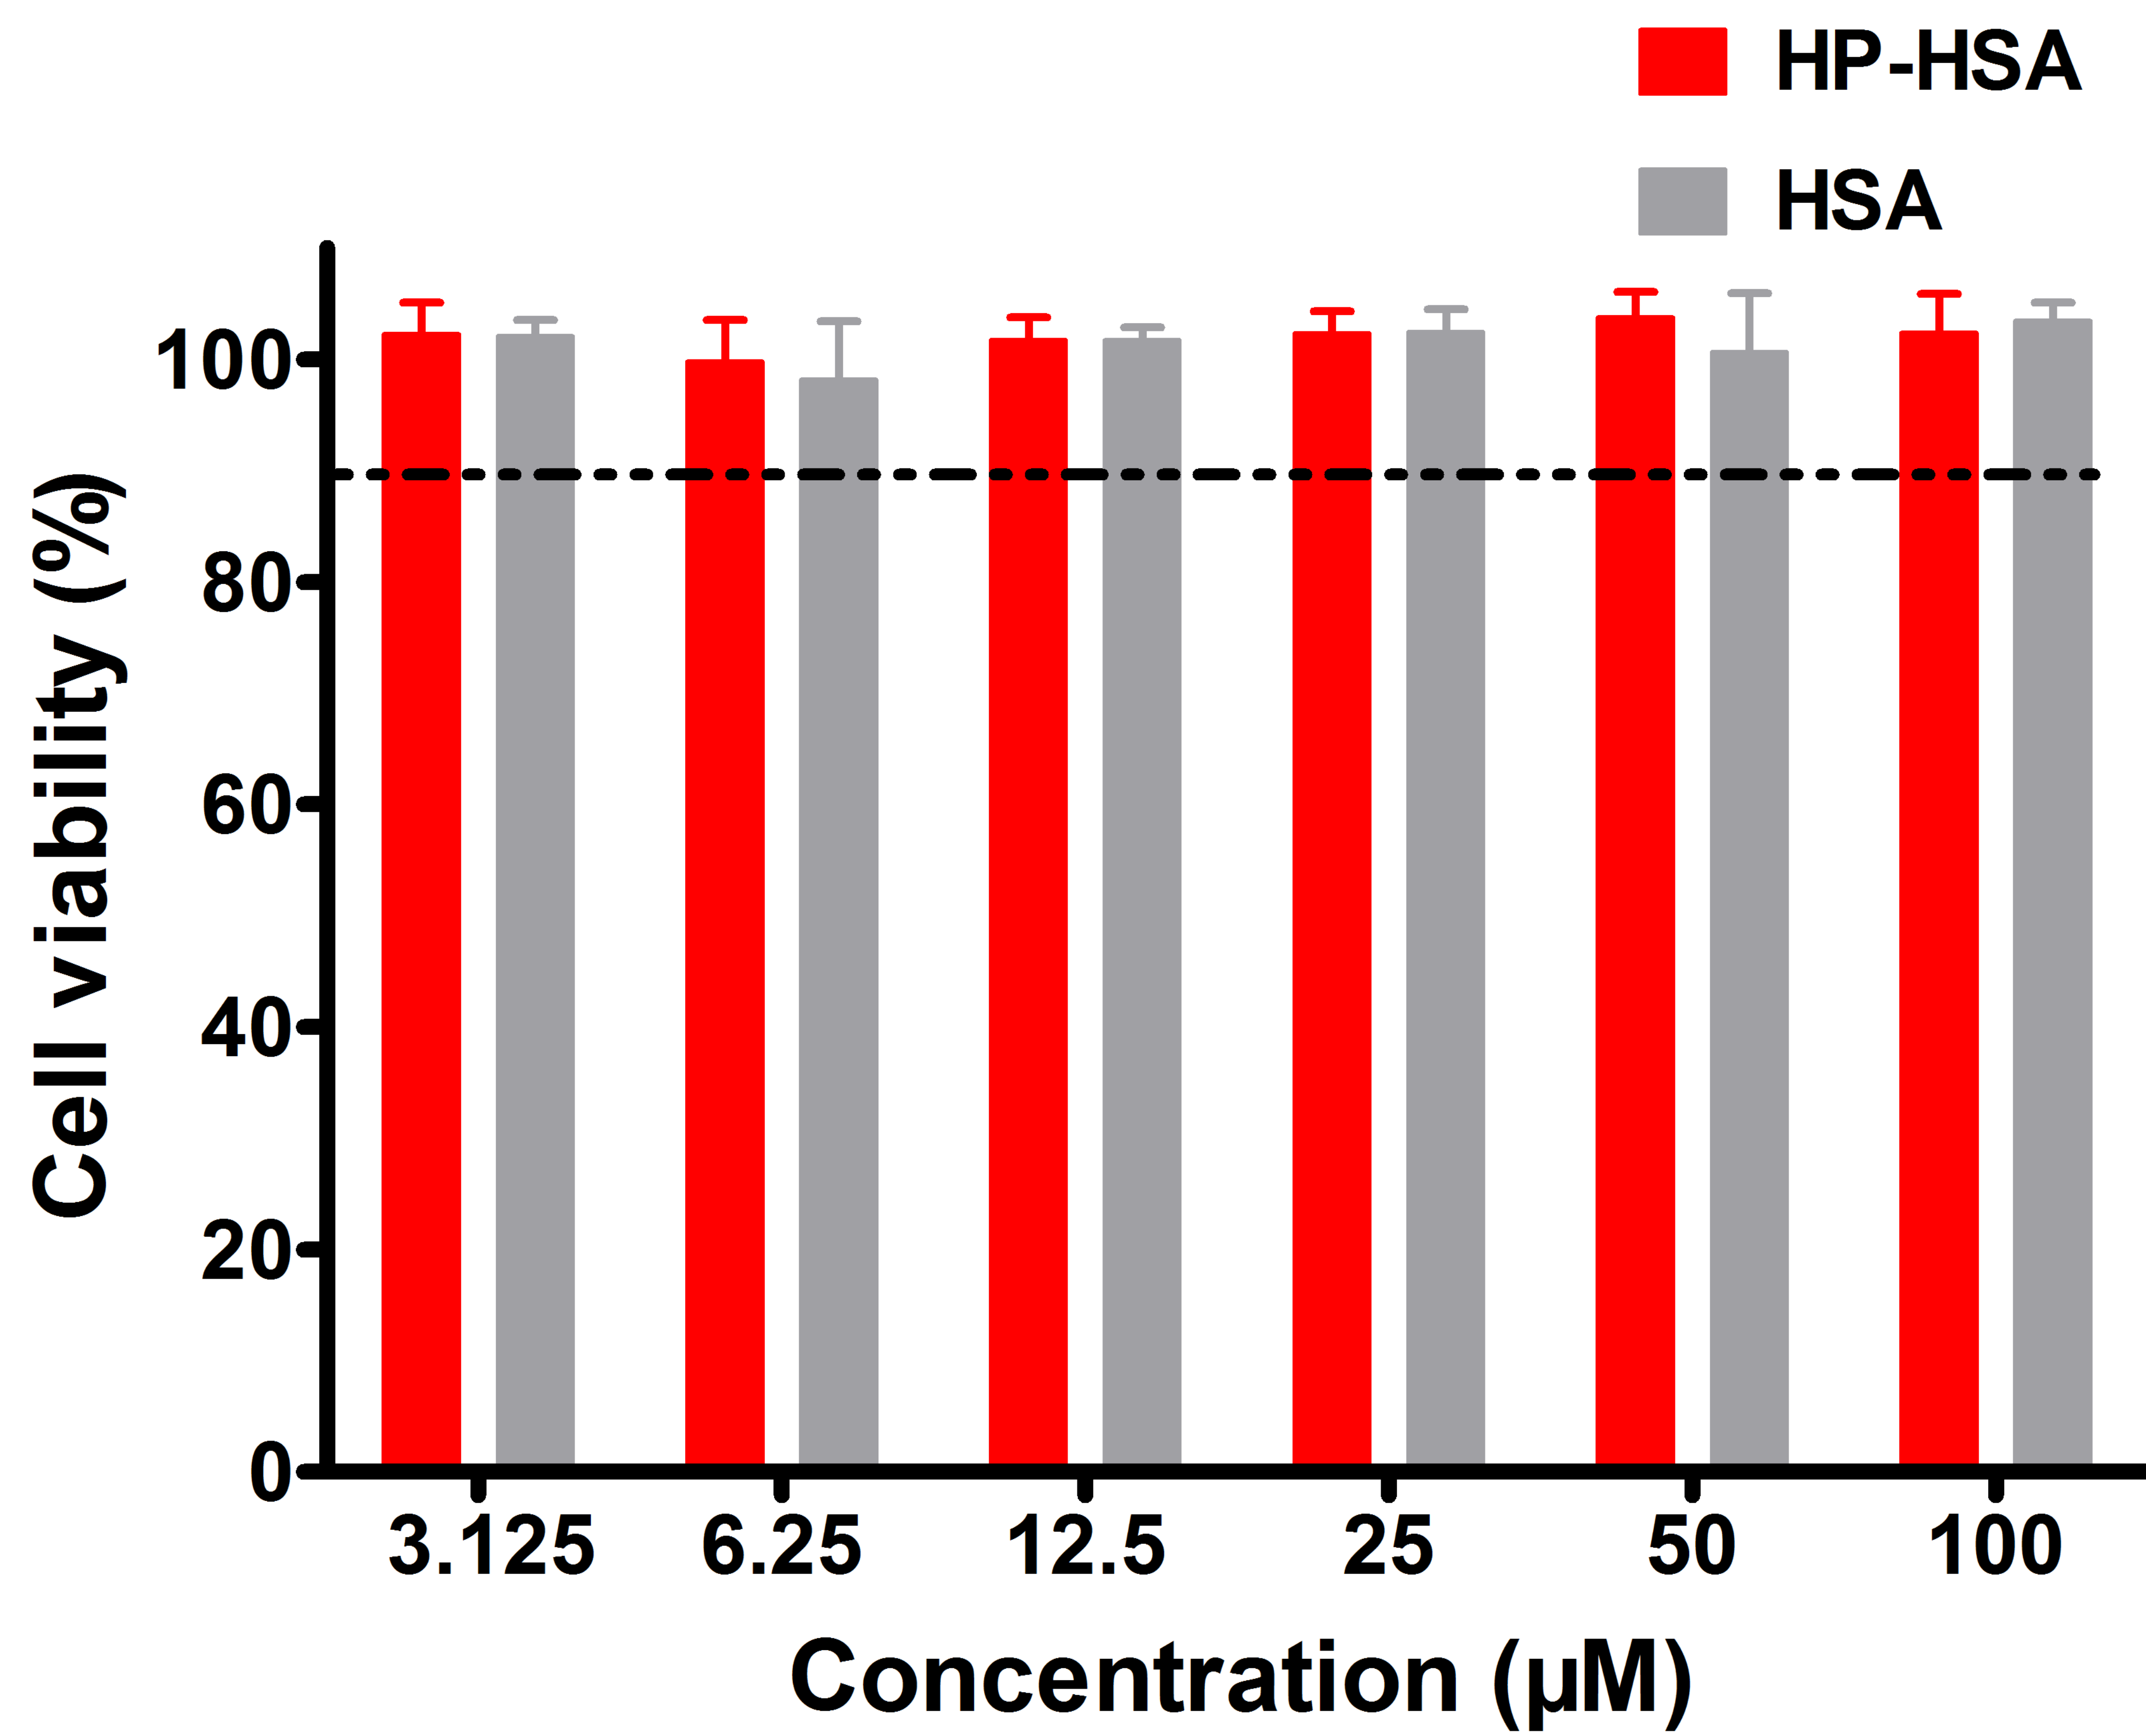

**FIG S4** The cytotoxicity of HP-HSA to differentiated human THP-1 cells was measured by CCK-8 cytotoxicity assay. The unmodified HSA was served as control. All the experiments were performed in triplicate, and the error bars indicate standard deviations.

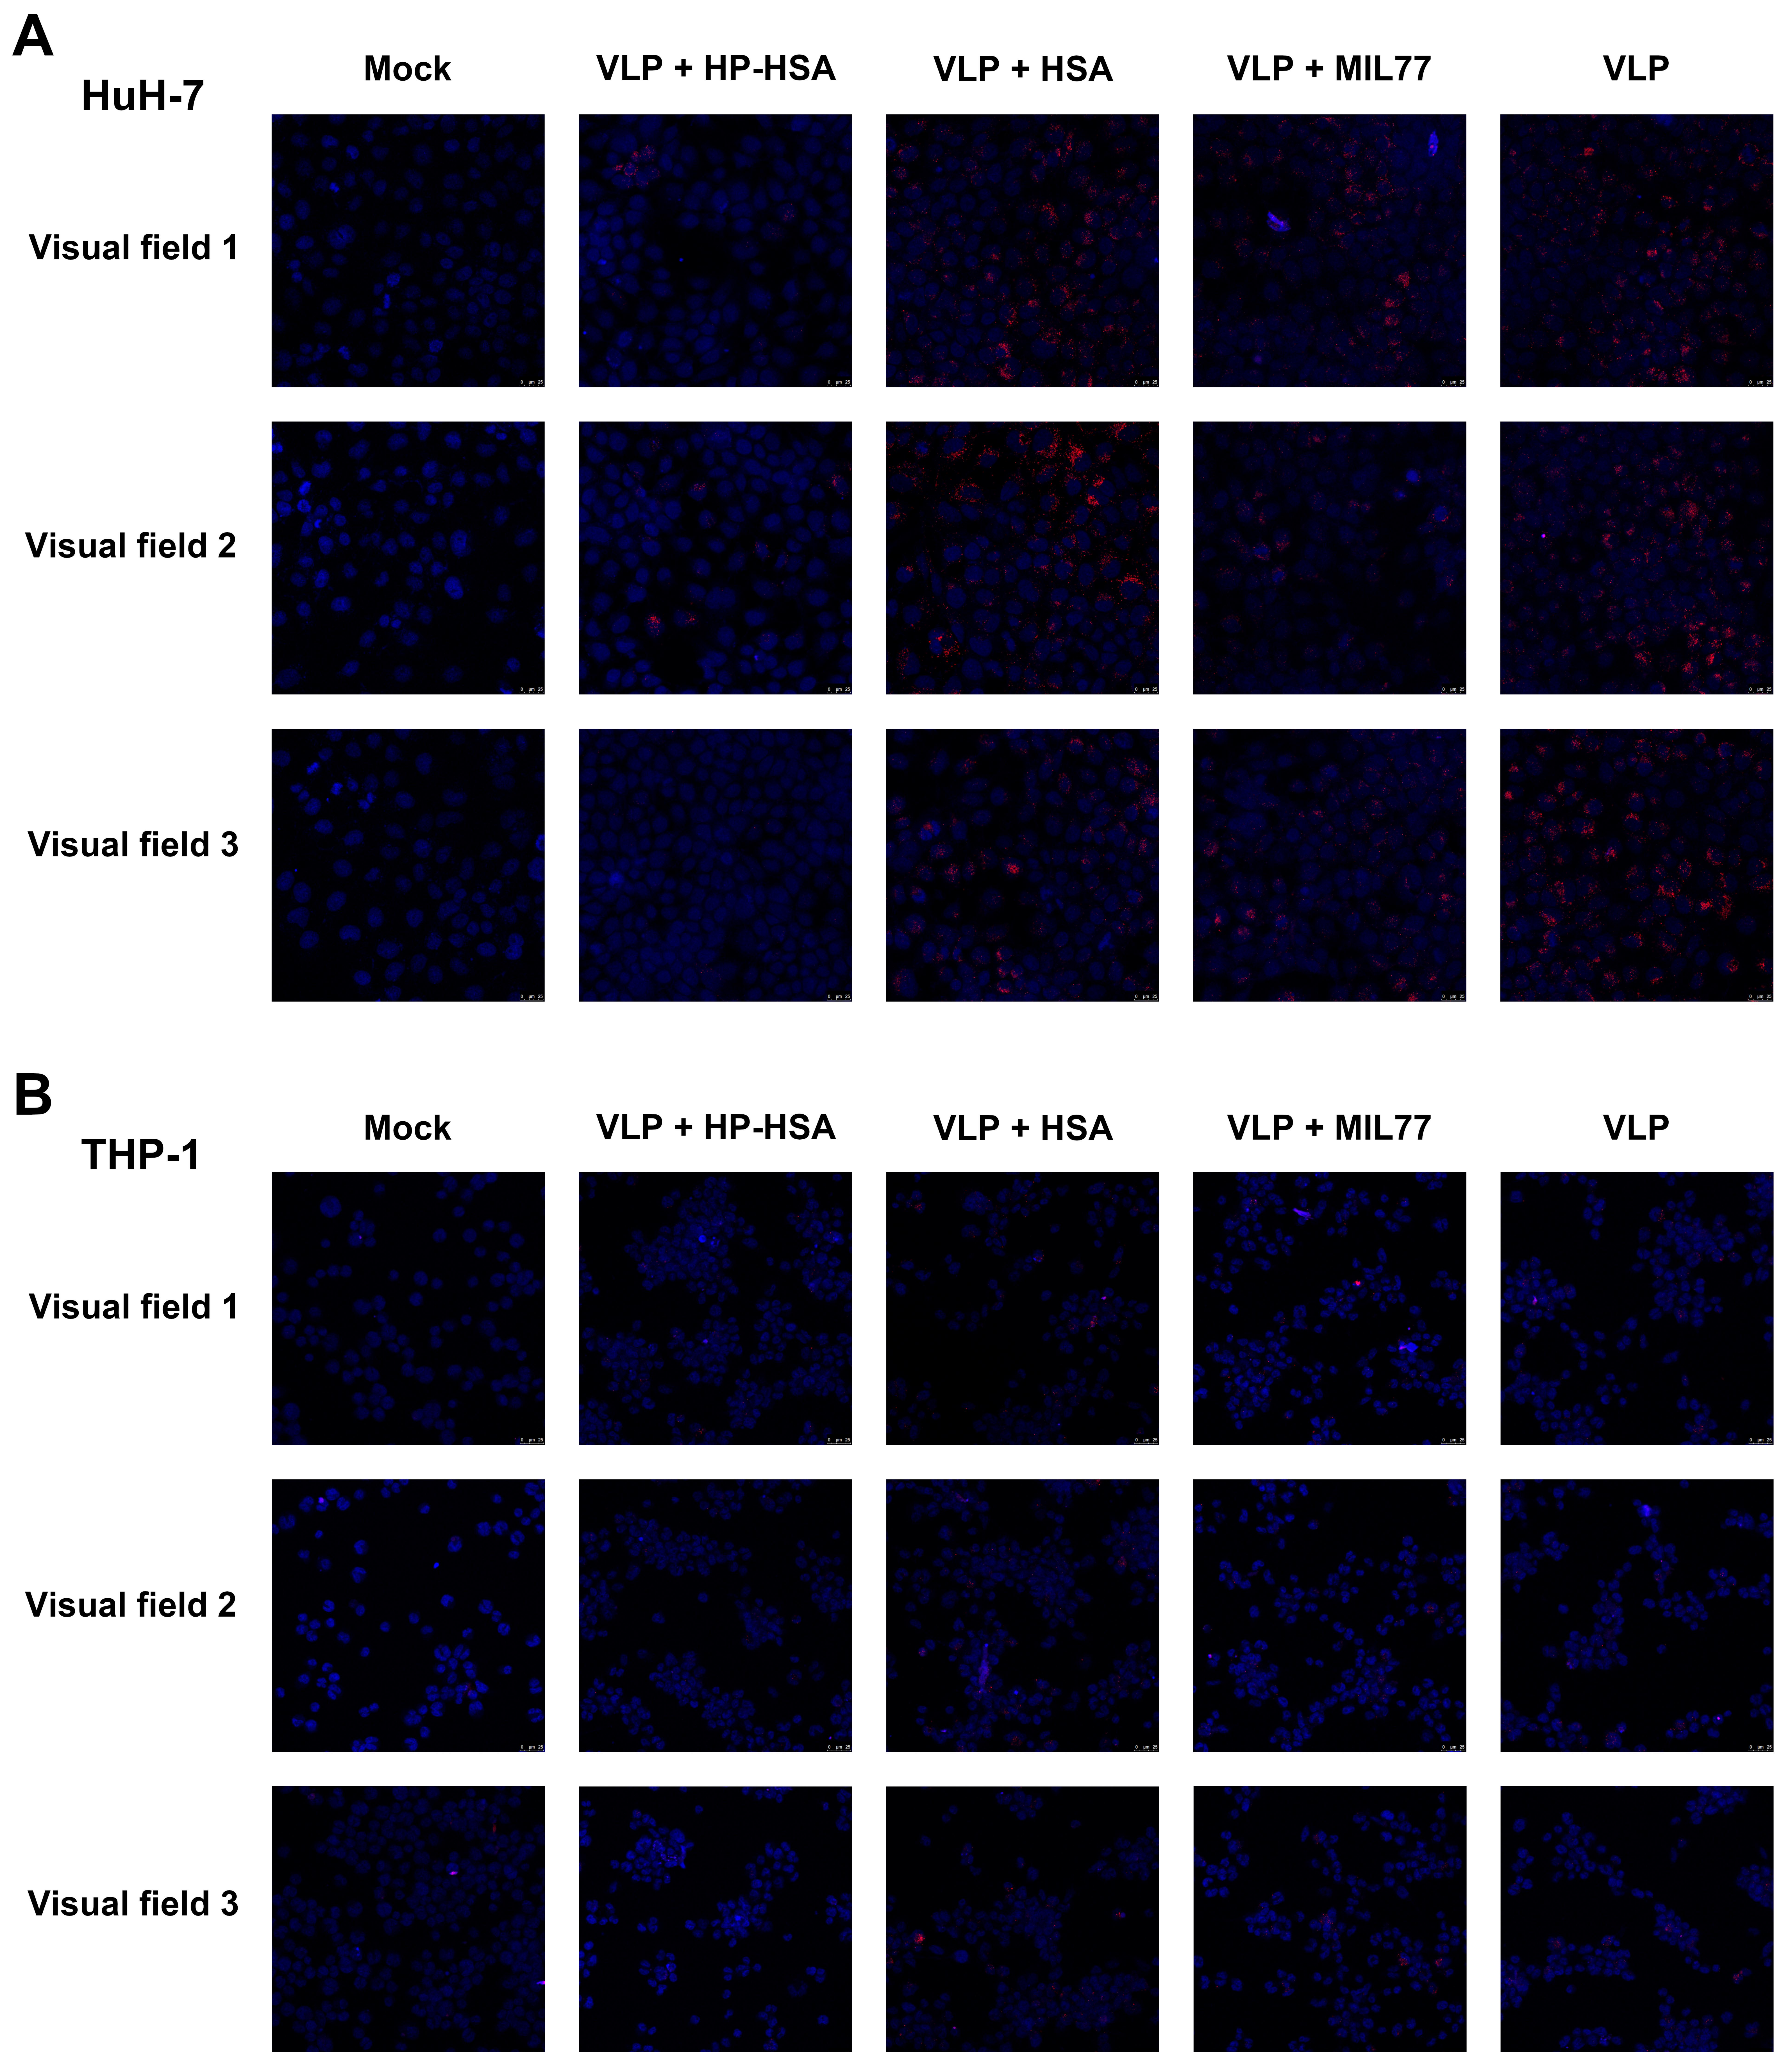

**FIG S5** The raw images (merged by DAPI channel and mCherry channel) applied for the analysis of Figure 6A.

The visual fields of different samples were arranged in (A) for HuH-7 cell and (B) for differentiated THP-1 cell.

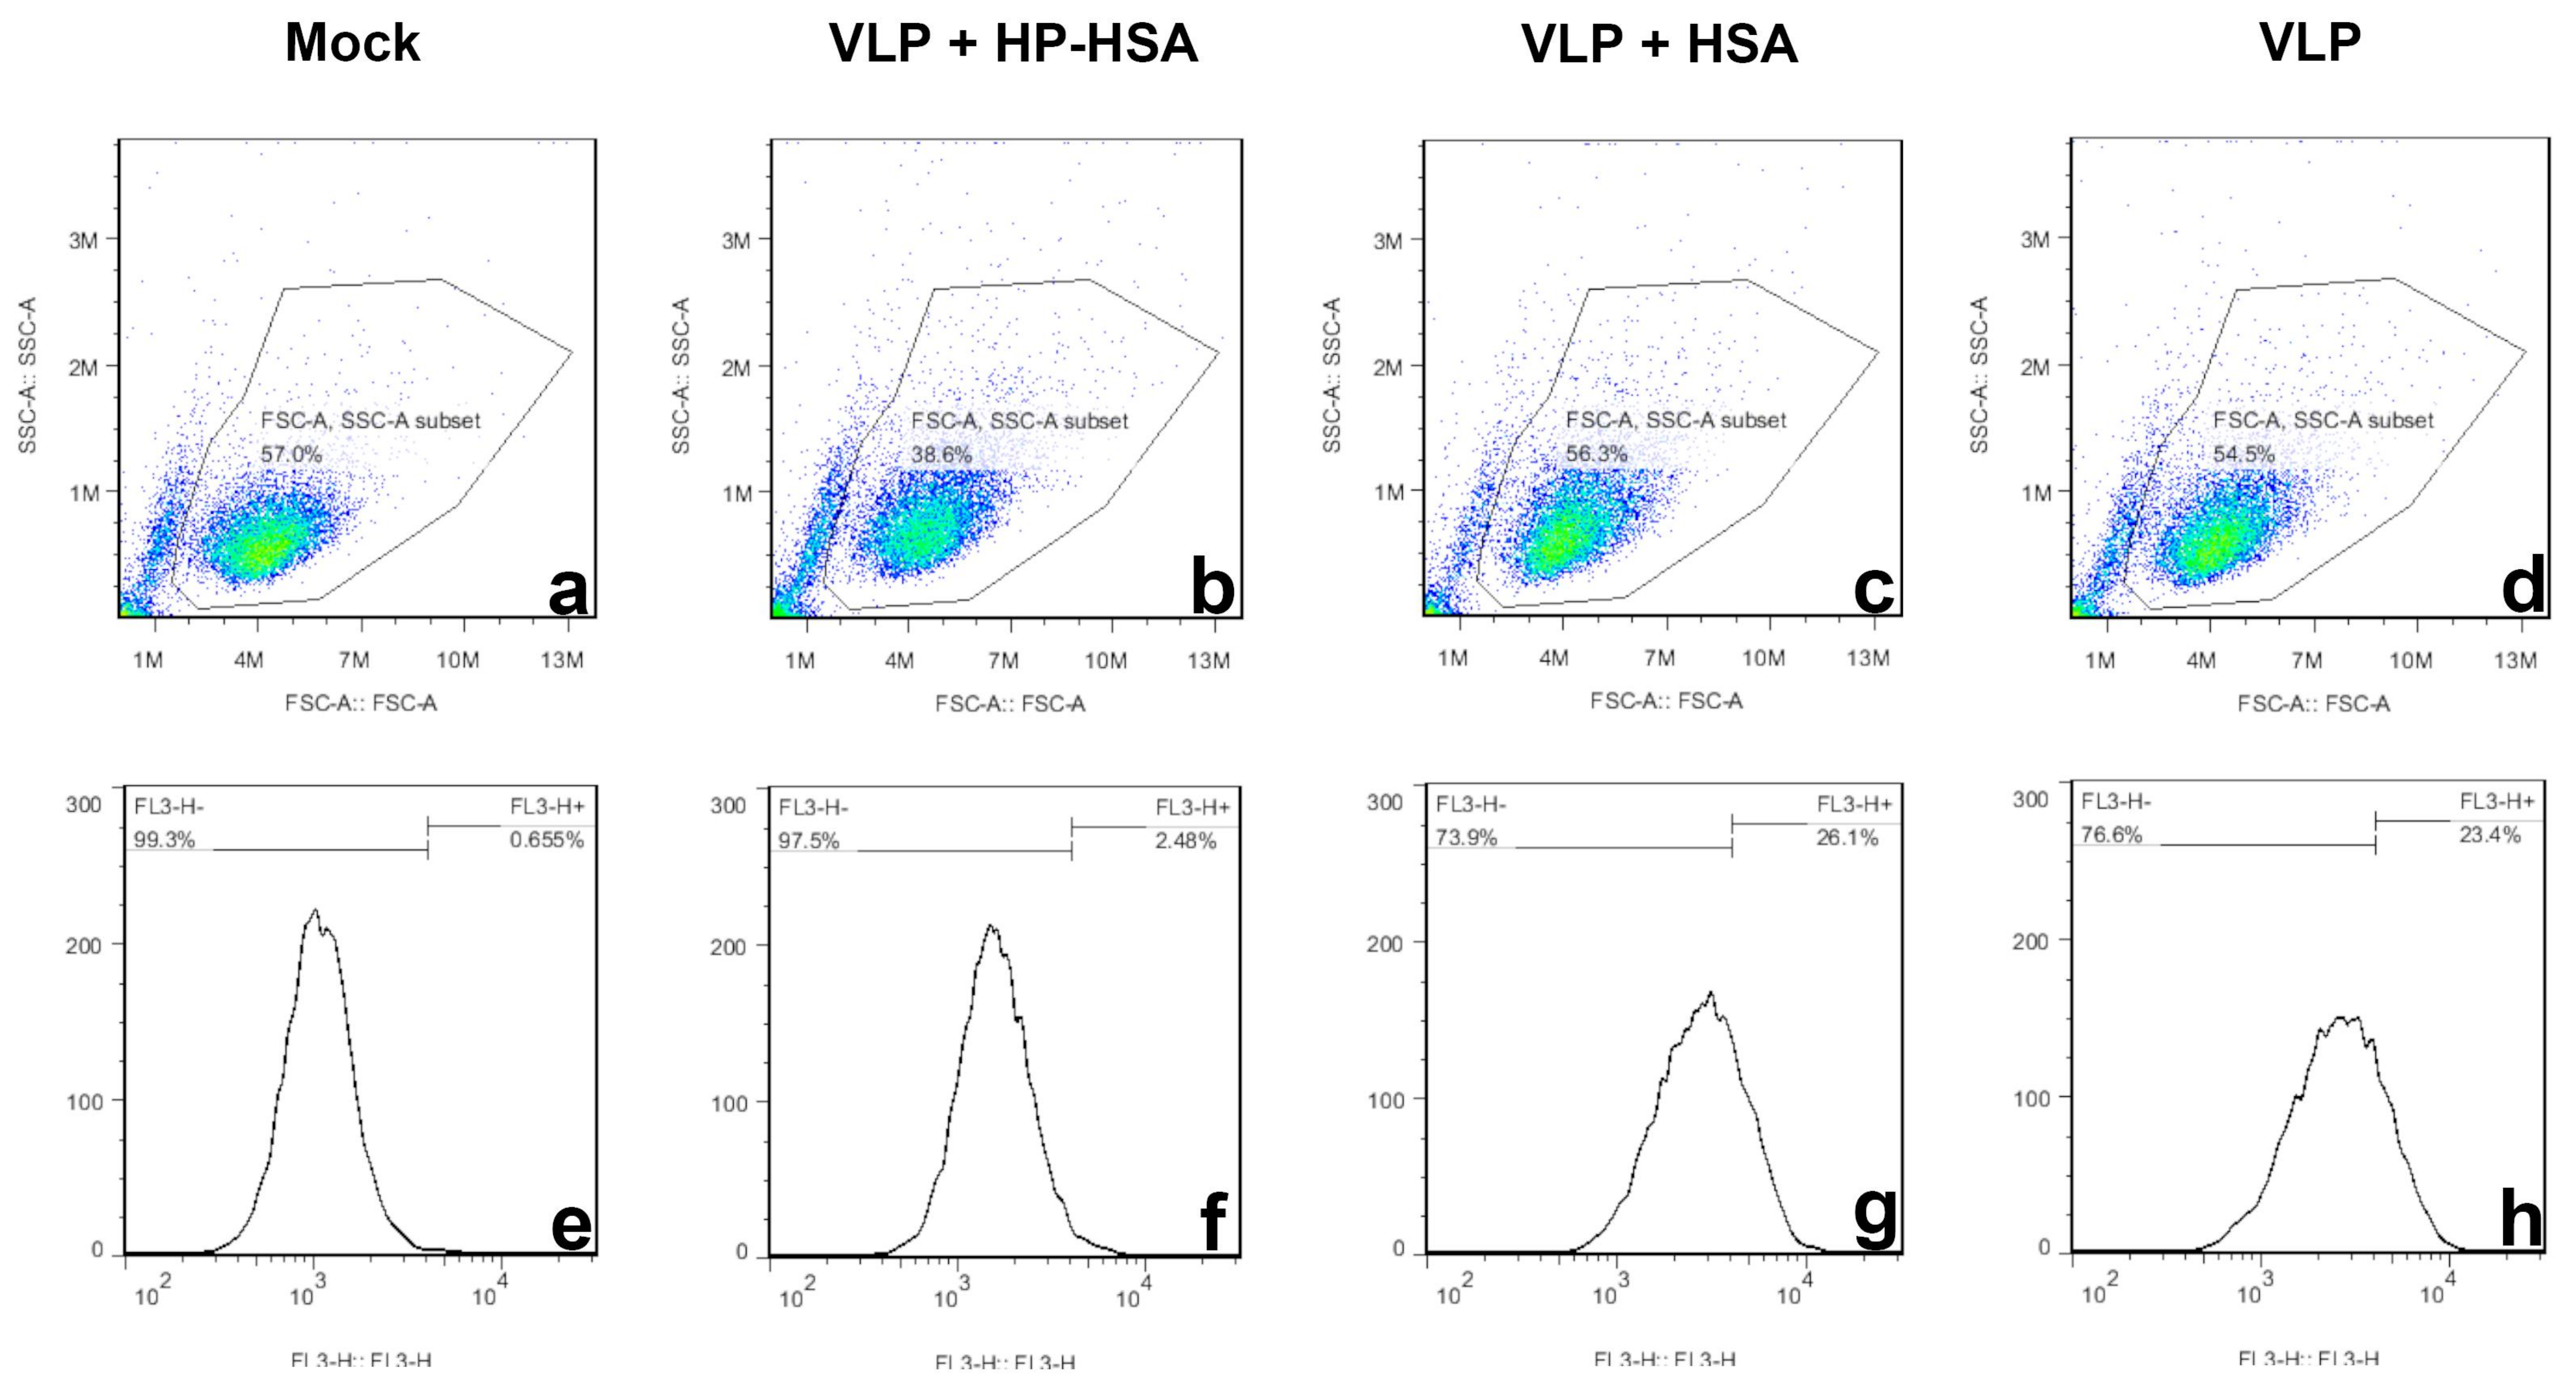

**FIG S6** The raw data of flow cytometry for the Figure 6B. The intact cells from different samples gated in (a-d) were further used to count the number of mCherry positive cells (e-h).

**DATASET.S1** The raw data of fluorescent images applied for Fig. 6A-a (HuH-7 cells) output by Image J.

| Sample                                                    | Visual Field | Area  | IntDen  | MinThr | MaxThr | CellNum | Area/CellNum | IntDen/CellNum |
|-----------------------------------------------------------|--------------|-------|---------|--------|--------|---------|--------------|----------------|
| Mock                                                      | 1            | 0     | N/A     | 0      | 200    | 151     | 0.00         | N/A            |
|                                                           | 2            | 0     | N/A     | 0      | 200    | 97      | 0.00         | N/A            |
|                                                           | 3            | 0     | N/A     | 0      | 200    | 113     | 0.00         | N/A            |
| VLP + HP-HSA                                              | 1            | 1687  | 256189  | 0      | 200    | 147     | 11.48        | 1742.78        |
|                                                           | 2            | 2441  | 354513  | 0      | 200    | 156     | 15.65        | 2272.52        |
|                                                           | 3            | 291   | 43434   | 0      | 200    | 231     | 1.26         | 188.03         |
| VLP + HSA                                                 | 1            | 19247 | 2920827 | 0      | 200    | 179     | 107.53       | 16317.47       |
|                                                           | 2            | 24550 | 3404812 | 0      | 200    | 125     | 196.40       | 27238.50       |
|                                                           | 3            | 12236 | 1882591 | 0      | 200    | 143     | 85.57        | 13164.97       |
| VLP + MIL77                                               | 1            | 13352 | 2079565 | 0      | 200    | 169     | 79.01        | 12305.12       |
|                                                           | 2            | 4669  | 758151  | 0      | 200    | 167     | 27.96        | 4539.83        |
|                                                           | 3            | 9848  | 1502177 | 0      | 200    | 187     | 52.66        | 8033.03        |
| VLP                                                       | 1            | 17053 | 2624626 | 0      | 200    | 219     | 77.87        | 11984.59       |
|                                                           | 2            | 19930 | 2983948 | 0      | 200    | 256     | 77.85        | 11656.05       |
|                                                           | 3            | 25642 | 3834110 | 0      | 200    | 148     | 173.26       | 25906.15       |
| <b>Area:</b> the fluorescence positive area in each image |              |       |         |        |        |         |              |                |
| <b>IntDen:</b> Intergated density                         |              |       |         |        |        |         |              |                |
| <b>MinThr:</b> minimum threshold                          |              |       |         |        |        |         |              |                |
| <b>MaxThr:</b> maximum threshold                          |              |       |         |        |        |         |              |                |
| <b>CellNum:</b> the cell numbers of each image            |              |       |         |        |        |         |              |                |

**DATASET.S2** The raw data of fluorescent images applied for Fig. 6A-b (differentiated THP-1 cells) output by Image J.

| Sample                                                    | Visual Field | Area | IntDen | MinThr | MaxThr | CellNum | Area/CellNum | IntDen/CellNum |
|-----------------------------------------------------------|--------------|------|--------|--------|--------|---------|--------------|----------------|
| Mock                                                      | 1            | 73   | 12132  | 0      | 200    | 114     | 0.64         | 106.42         |
|                                                           | 2            | 367  | 62821  | 0      | 200    | 100     | 3.67         | 628.21         |
|                                                           | 3            | 679  | 97894  | 0      | 200    | 249     | 2.73         | 393.15         |
| VLP + HP-HSA                                              | 1            | 637  | 96462  | 0      | 200    | 255     | 2.50         | 378.28         |
|                                                           | 2            | 318  | 49723  | 0      | 200    | 193     | 1.65         | 257.63         |
|                                                           | 3            | 329  | 54737  | 0      | 200    | 150     | 2.19         | 364.91         |
| VLP + HSA                                                 | 1            | 1330 | 192409 | 0      | 200    | 158     | 8.42         | 1217.78        |
|                                                           | 2            | 2083 | 335501 | 0      | 200    | 233     | 8.94         | 1439.92        |
|                                                           | 3            | 1840 | 261216 | 0      | 200    | 176     | 10.45        | 1484.18        |
| VLP + MIL77                                               | 1            | 2111 | 304144 | 0      | 200    | 189     | 11.17        | 1609.23        |
|                                                           | 2            | 1271 | 173336 | 0      | 200    | 170     | 7.48         | 1019.62        |
|                                                           | 3            | 1277 | 196571 | 0      | 200    | 152     | 8.40         | 1293.23        |
| VLP                                                       | 1            | 1279 | 193118 | 0      | 200    | 184     | 6.95         | 1049.55        |
|                                                           | 2            | 1190 | 181284 | 0      | 200    | 132     | 9.02         | 1373.36        |
|                                                           | 3            | 1122 | 176951 | 0      | 200    | 152     | 7.38         | 1164.15        |
| <b>Area:</b> the fluorescence positive area in each image |              |      |        |        |        |         |              |                |
| <b>IntDen:</b> Intergated density                         |              |      |        |        |        |         |              |                |
| <b>MinThr:</b> minimum threshold                          |              |      |        |        |        |         |              |                |
| <b>MaxThr:</b> maximum threshold                          |              |      |        |        |        |         |              |                |
| <b>CellNum:</b> the cell numbers of each image            |              |      |        |        |        |         |              |                |

**DATASET.S3** The raw data of fluorescent images applied for Fig. 6C (HuH-7 cells) output by Image J.

| Sample                                                    | Visual Field | Area | IntDen | MinThr | MaxThr | CellNum | Area/CellNum | IntDen/CellNum |
|-----------------------------------------------------------|--------------|------|--------|--------|--------|---------|--------------|----------------|
| Mock                                                      | 1            | 8    | 1543   | 0      | 200    | 116     | 0.07         | 13.30          |
|                                                           | 2            | 26   | 4695   | 0      | 200    | 119     | 0.22         | 39.45          |
|                                                           | 3            | 1    | 179    | 0      | 200    | 122     | 0.01         | 1.47           |
| VLP + HP-HSA                                              | 1            | 35   | 5984   | 0      | 200    | 110     | 0.32         | 54.40          |
|                                                           | 2            | 75   | 11889  | 0      | 200    | 105     | 0.71         | 113.23         |
|                                                           | 3            | 35   | 5406   | 0      | 200    | 113     | 0.31         | 47.84          |
| VLP + HSA                                                 | 1            | 473  | 65585  | 0      | 200    | 103     | 4.59         | 636.75         |
|                                                           | 2            | 463  | 59640  | 0      | 200    | 110     | 4.21         | 542.18         |
|                                                           | 3            | 642  | 88770  | 0      | 200    | 97      | 6.62         | 915.15         |
| VLP                                                       | 1            | 290  | 41041  | 0      | 200    | 132     | 2.20         | 310.92         |
|                                                           | 2            | 262  | 33548  | 0      | 200    | 99      | 2.65         | 338.87         |
|                                                           | 3            | 308  | 44502  | 0      | 200    | 91      | 3.38         | 489.03         |
| <b>Area:</b> the fluorescence positive area in each image |              |      |        |        |        |         |              |                |
| <b>IntDen:</b> Intergated density                         |              |      |        |        |        |         |              |                |
| <b>MinThr:</b> minimum threshold                          |              |      |        |        |        |         |              |                |
| <b>MaxThr:</b> maximum threshold                          |              |      |        |        |        |         |              |                |
| <b>CellNum:</b> the cell numbers of each image            |              |      |        |        |        |         |              |                |
